# Supplementary material for: Combination of Panax ginseng and Diospyros kaki Leaf Inhibits White Adipocyte Differentiation and Browning Process through AMP-Activated Protein Kinase (AMPK) Activation In Vitro and In Vivo
Source: MDPI journal article supplement (doi:10.3390/nu15122776), 2023-06-16
Supplement: s1 [file s1]

**Supplement Table S1. HPLC condition for analysis of ginsenoside Rg1, Rb1 and Rg3 in PG.**

| HPLC condition   | Condition 1                           |       |       |
|------------------|---------------------------------------|-------|-------|
| Column           | C18 column<br>(250 nm × 4.6 mm, 5 μm) |       |       |
| Column temp.     | 35 °C                                 |       |       |
| Flow rate        | 1 mL/min                              |       |       |
| Wave length      | 203 nm                                |       |       |
| Injection volume | 10 μL                                 |       |       |
| Mobile solvent   | A: Acetonitrile                       |       |       |
|                  | B: Water                              |       |       |
| Mobile phase     | Time<br>(min)                         | A (%) | B (%) |
|                  | 0                                     | 20    | 80    |
|                  | 40                                    | 60    | 40    |
|                  | 41                                    | 20    | 80    |
|                  | 45                                    | 20    | 80    |

**Supplement Table S2. HPLC condition for analysis of tannic acid in DKL.**

| HPLC condition   | Condition 2                                               |       |       |
|------------------|-----------------------------------------------------------|-------|-------|
| Column           | Zorbax Eclipse Plus C18 column<br>(250 nm × 4.6 mm, 5 μm) |       |       |
| Column temp.     | 30 °C                                                     |       |       |
| Flow rate        | 1 mL/min                                                  |       |       |
| Wave length      | 280 nm                                                    |       |       |
| Injection volume | 10 μL                                                     |       |       |
| Mobile solvent   | A: Water                                                  |       |       |
|                  | B: Acetonitrile                                           |       |       |
| Mobile phase     | Time<br>(min)                                             | A (%) | B (%) |
|                  | 0                                                         | 95    | 5     |
|                  | 2                                                         | 95    | 5     |

|  |    |    |    |
|--|----|----|----|
|  | 3  | 40 | 60 |
|  | 10 | 40 | 60 |
|  | 11 | 95 | 0  |
|  | 15 | 95 | 0  |

**Supplement Table S3. Calibration data of ginsenoside Rg1, Rb1 and Rg3 in PG and tannic acid in DKL.**

| Compound        | Linear range (mg/L) | Response Slope (a) | Response Factor (b) | Correlation coefficient ( $R^2$ ) | LOD (mg/L) | LOQ (mg/L) |
|-----------------|---------------------|--------------------|---------------------|-----------------------------------|------------|------------|
| Ginsenoside Rg1 | 2.5 ~ 100           | 3283.2             | -1139.6             | 0.9996                            | 2.56       | 7.77       |
| Ginsenoside Rb1 | 2.5 ~ 100           | 2323               | -953.87             | 0.9996                            | 2.43       | 7.36       |
| Ginsenoside Rg3 | 2.5 ~ 100           | 3425.7             | -464.03             | 0.9996                            | 2.43       | 7.38       |
| Tannic acid     | 18424.21            | -736552.17         | 0.9987              | 49.68                             | 150.55     |            |

**Supplement Table S4. Contents of ginsenoside Rg1, Rb1 and Rg3 in PG and tannic acid in DKL.**

| Sample                                                     | Contents of standards (%) |                 |                 |
|------------------------------------------------------------|---------------------------|-----------------|-----------------|
|                                                            | Ginsenoside Rg1           | Ginsenoside Rb1 | Ginsenoside Rg3 |
| <i>Panax ginseng</i><br>(Ginseng Radix Red)                | 0.87                      | 1.26            | 0.09            |
| <i>Panax ginseng</i> :<br><i>Diospyros kaki</i> leaf (1:3) | 0.25                      | 0.23            | 0.03            |
| Sample                                                     | Contents of standards (%) |                 |                 |

| Tannic acid                                                |      |
|------------------------------------------------------------|------|
| <i>Diospyros kaki</i> leaf                                 | 5.49 |
| <i>Panax ginseng</i> :<br><i>Diospyros kaki</i> leaf (1:3) | 5.06 |
